# Supplementary material
Source: ML conference proceedings conference paper supplement (https://proceedings.mlr.press/v164/wong22a.html)
Supplement: Supplementary file 1 [file wong22a-supp.zip]

Archive with 3 entries (3 files):
- 2021_corl_igrtmm_camera_ready_appendix.pdf
- __MACOSX/._2021_corl_igrtmm_camera_ready_appendix.pdf
- __MACOSX/error_aware_imitation_learning-Supplementary Material/._corl_2021_supplementary_video_final.mp4
